# Supplementary figures and images for: Worldwide outcomes of nasal transposition of the split lateral rectus muscle for strabismus associated with 3rd-nerve palsy
Source: HighWire-hosted journal article supplement (doi:10.1136/bjophthalmol-2021-319667), 2021-12-08

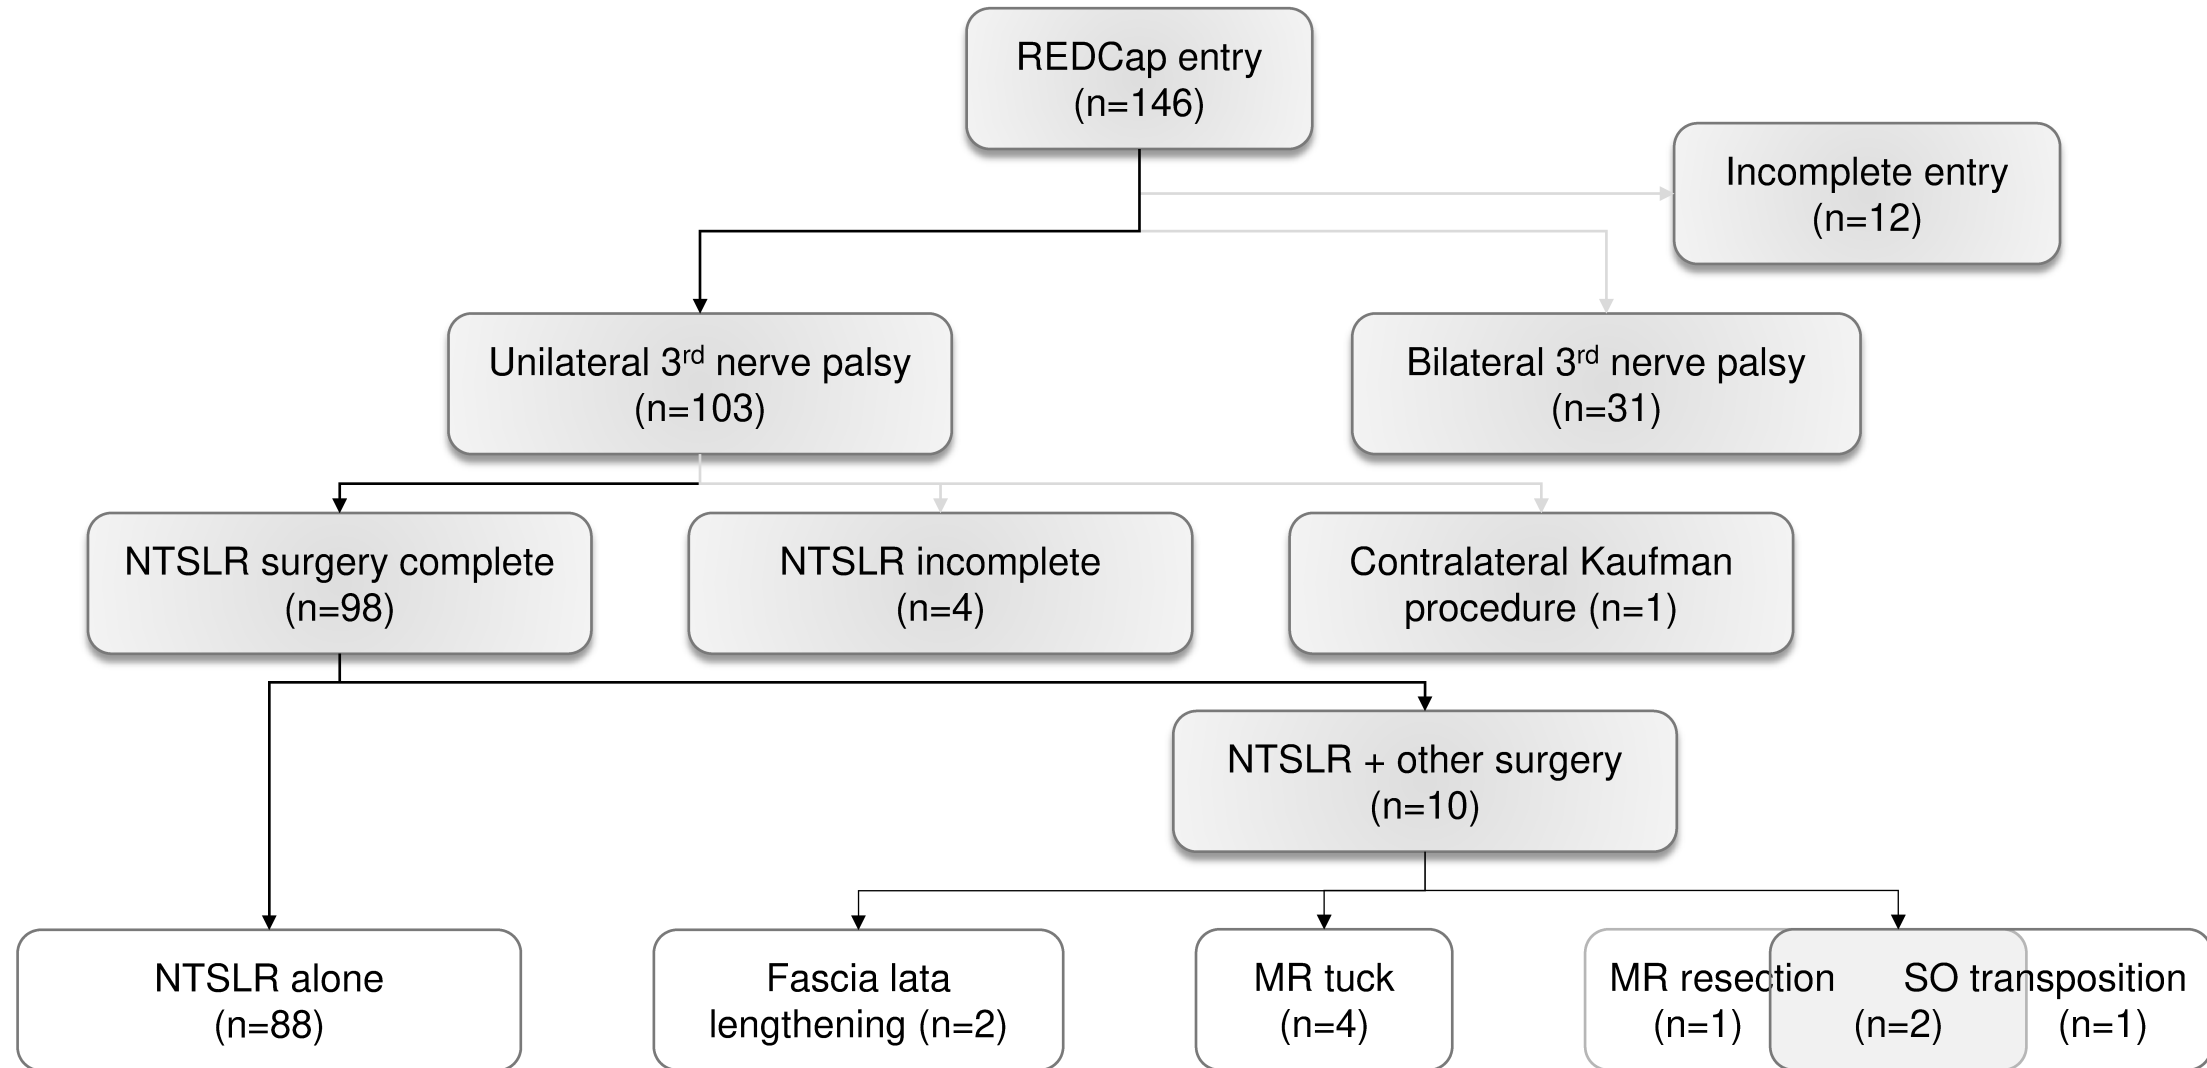

Supplement: bjophthalmol-2021-319667supp001_data_supplement.pdf [file bjophthalmol-2021-319667supp001_data_supplement.pdf]
